# Supplementary material
Source: MDPI journal article supplement (https://www.mdpi.com/2073-4441/16/1/133)
Supplement: s1 [file s1 › water-2767439-supplementary.pdf]

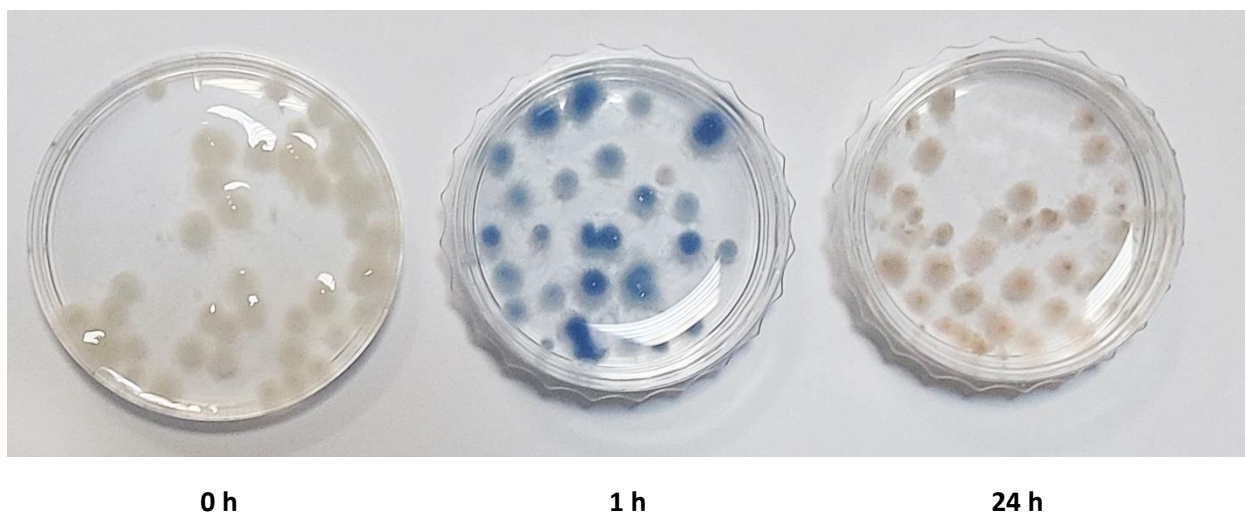

**Supplementary Figure S1.** Mycelium appearance at different time points of RBBR degradation.

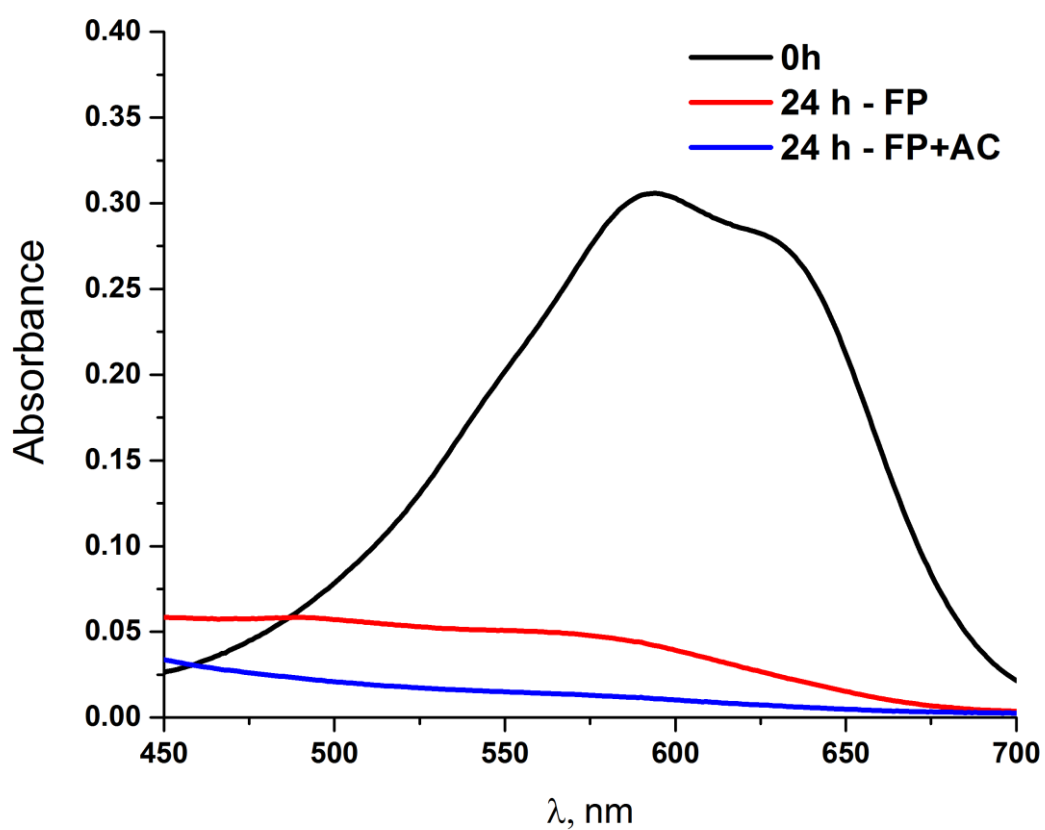

**Supplementary Figure S2.** UV/Vis spectra of RBBR before degradation (black line) and after degradation by fungal pellets (FP, red line) and fungal pellets supplemented with activated charcoal (FP+AC, blue line) for 24 h.
